# Supplementary material for: A Comprehensive Bioinformatics Analysis of Notch Pathways in Bladder Cancer
Source: MDPI journal article supplement (doi:10.3390/cancers13123089), 2021-06-21
Supplement: s1 [file s1]

# Supplementary Material: A Comprehensive Bioinformatics Analysis of Notch Pathways in Bladder Cancer

Chuan Zhang <sup>1,2</sup>, Mandy Berndt-Paetz <sup>1</sup> and Jochen Neuhaus <sup>1,\*</sup>

**File S1.** list of full gene names and description of “GSE20727 CTRL vs ROS INH and DNFB allergen treated DC DN”.

| Gene          | Full name of protein                                          |
|---------------|---------------------------------------------------------------|
| APH1A         | Gamma-secretase subunit APH-1A                                |
| APH1B         | Gamma-secretase subunit APH-1B                                |
| DLK1          | Protein delta homolog 1                                       |
| DLL1          | Delta-like protein 1                                          |
| DLL3          | Delta-like protein 3                                          |
| DLL4          | Delta-like protein 4                                          |
| DNER          | Delta and Notch-like epidermal growth factor-related receptor |
| DTX1          | E3 ubiquitin-protein ligase DTX1                              |
| GNPTAB        | N-acetylglucosamine-1-phosphotransferase subunits alpha/beta  |
| HEG1          | Protein HEG homolog 1                                         |
| HES1          | Hairy and enhancer of split 1                                 |
| HES6          | Hairy and enhancer of split 6                                 |
| HEY1          | Hairy/enhancer-of-split related with YRPW motif protein 1     |
| JAG1          | Protein jagged-1                                              |
| JAG2          | Protein jagged-2                                              |
| LFNG          | Beta-1,3-N-acetylglucosaminyltransferase lunatic fringe       |
| LTBP2         | Latent-transforming growth factor beta-binding protein 2      |
| MAML1         | Mastermind-like protein 1                                     |
| MAML2         | Mastermind-like protein 2                                     |
| MAML3         | Mastermind-like protein 3                                     |
| MFNG          | Beta-1,3-N-acetylglucosaminyltransferase manic fringe         |
| NCSTN         | Nicastrin                                                     |
| NEURL1        | E3 ubiquitin-protein ligase NEURL1                            |
| NEURL1B       | E3 ubiquitin-protein ligase NEURL1B                           |
| NOTCH1        | Neurogenic locus notch homolog protein 1                      |
| NOTCH2        | Neurogenic locus notch homolog protein 2                      |
| NOTCH3        | Neurogenic locus notch homolog protein 3                      |
| NOTCH4        | Neurogenic locus notch homolog protein 4                      |
| POFUT1        | GDP-fucose protein O-fucosyltransferase 1                     |
| RP11-458D21.5 | Uncharacterized protein                                       |
| SNED1         | Sushi, nidogen and EGF-like domain-containing protein 1       |

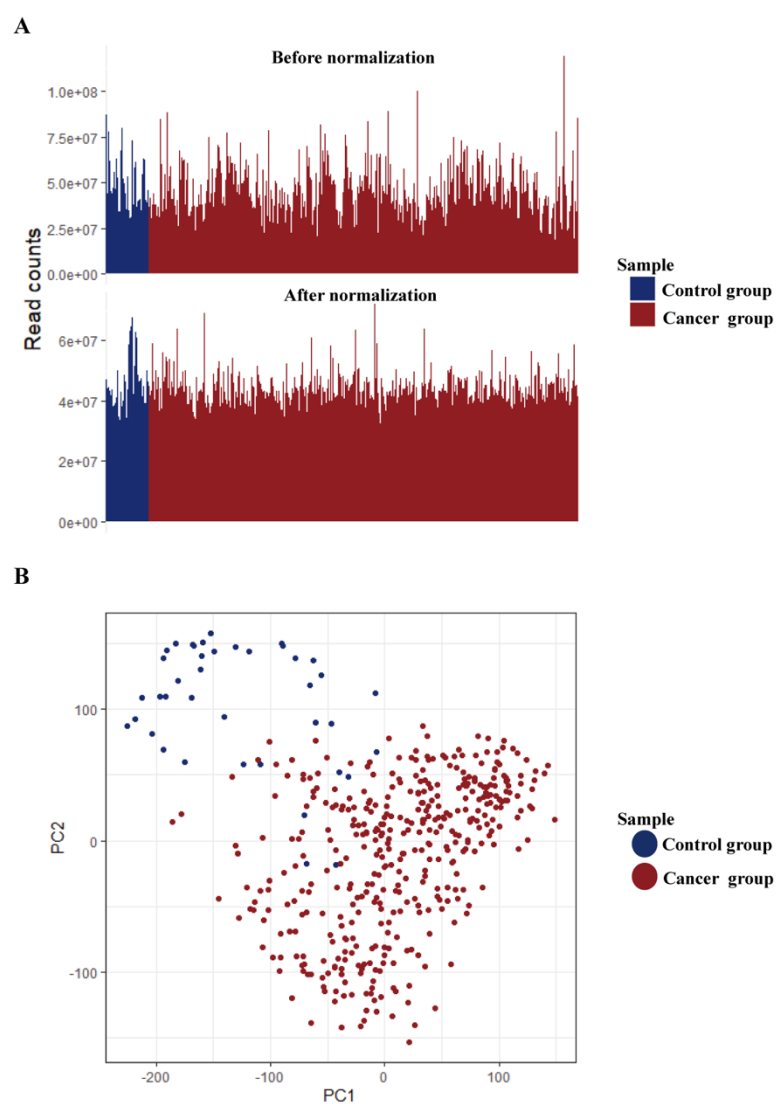

**Figure S1.** Distribution of data before and after normalization (A). and principle-component analysis of the data after the normalization.

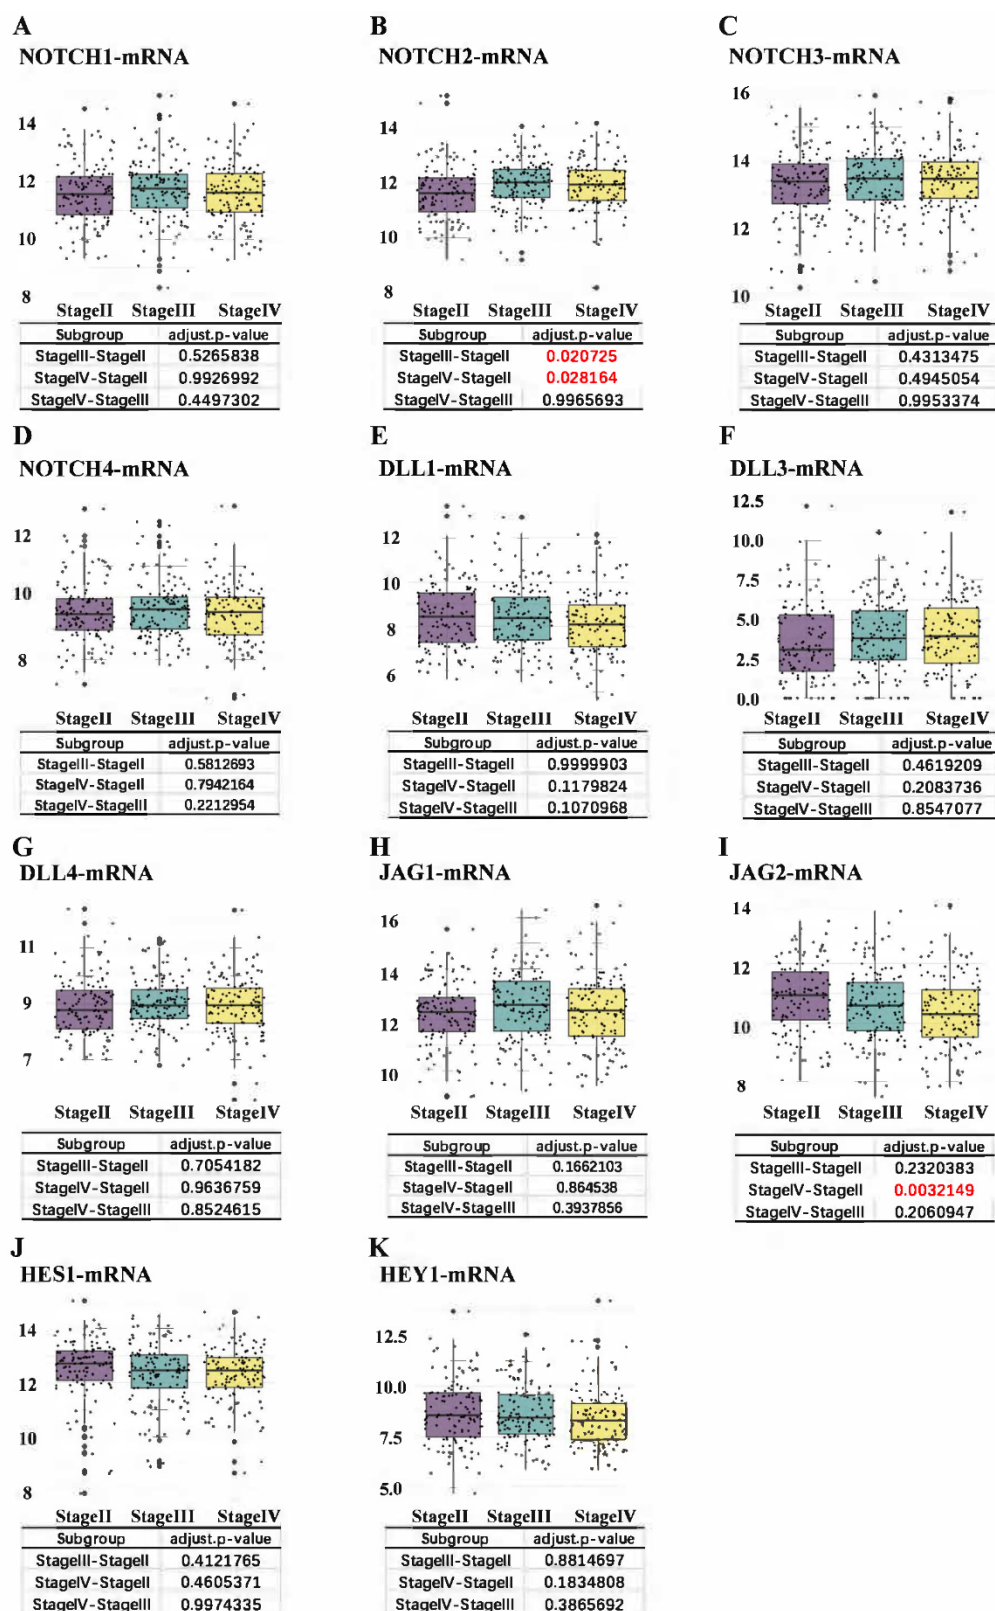

**Figure S2.** Expression of Notch-related genes in relation to tumor TNM-stage; box indicates 25%-75% percentile, line = median, whiskers indicate 95% CI; significant  $p$ -values ( $p < 0.05$ ) are colored red.

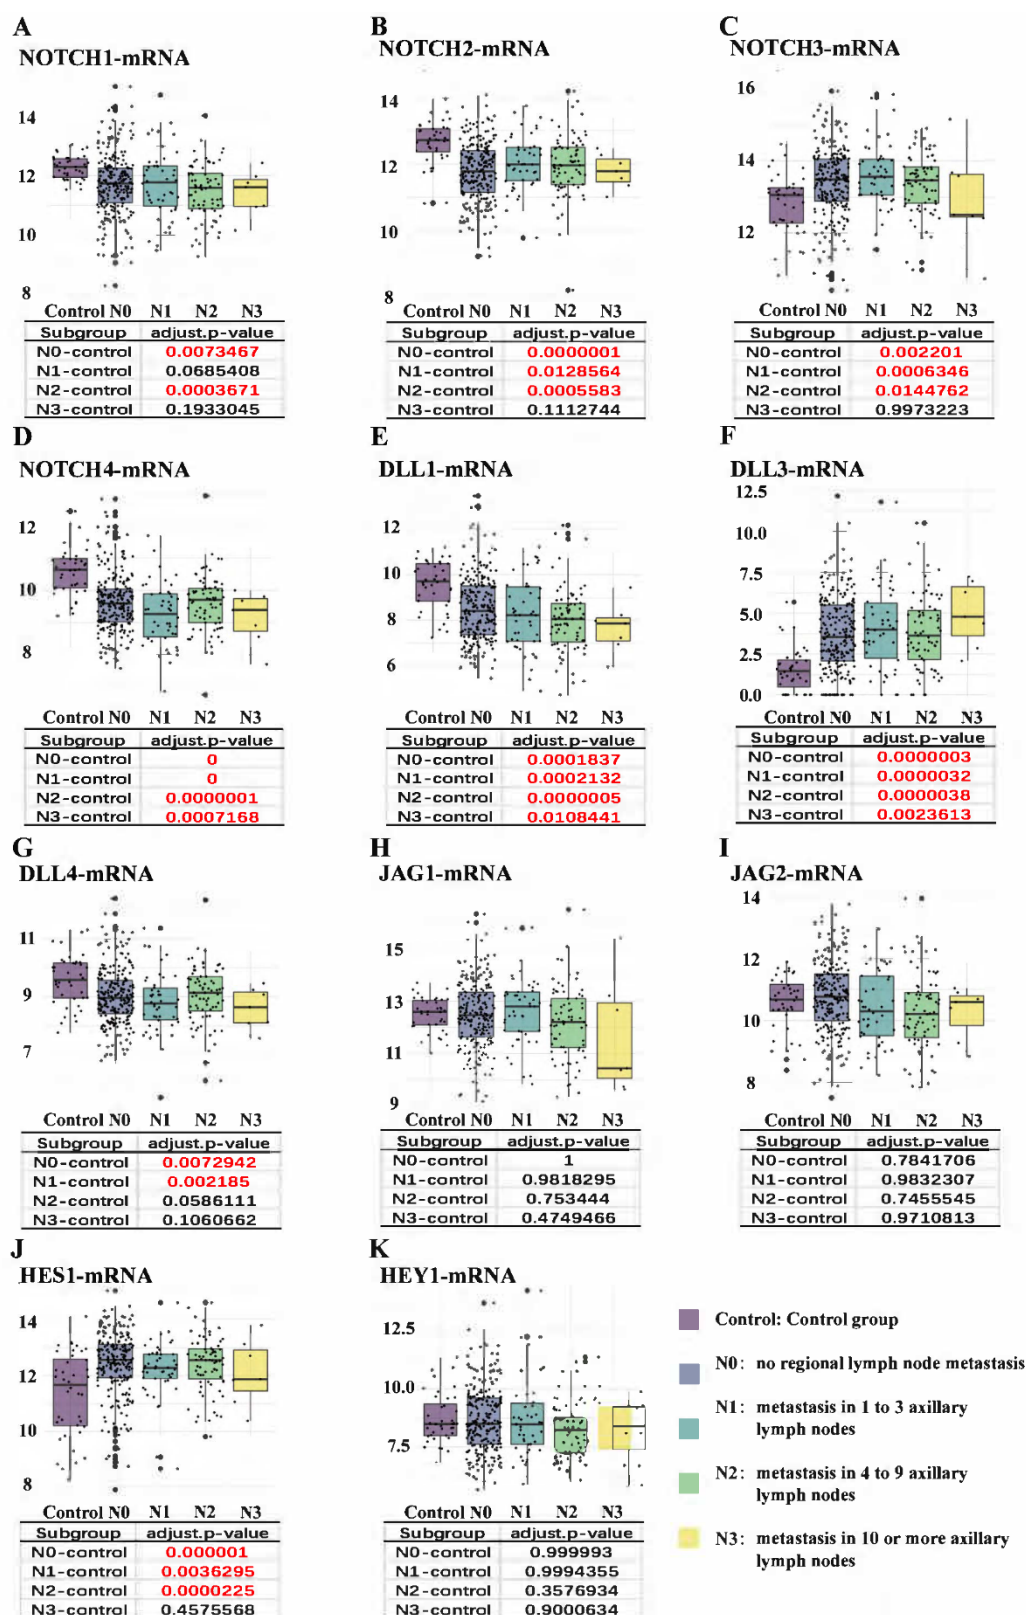

**Figure S3.** Expression of Notch-related genes in relation to lymph node status; box indicates 25%-75% percentile, line = median, whiskers indicate 95% CI; significant  $p$ -values ( $p < 0.05$ ) are colored red.

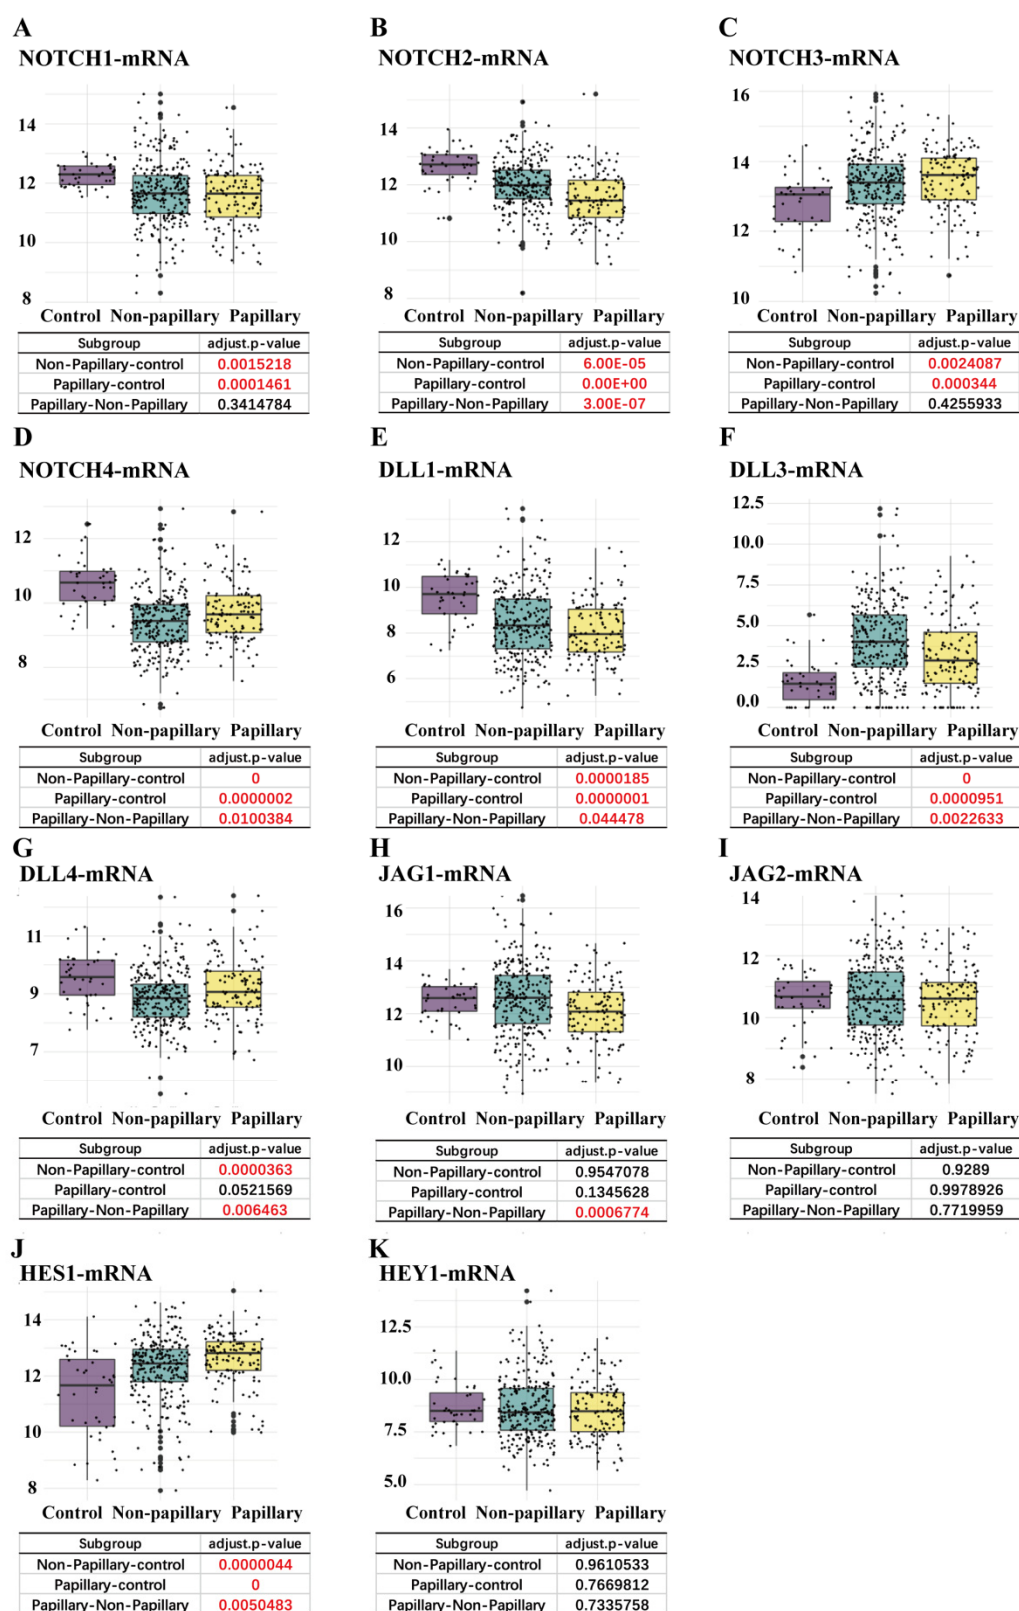

**Figure S4.** Expression of Notch-related genes in relation to histologic type (papillary vs. non-papillary); box indicates 25%-75% percentile, line = median, whiskers indicate 95% CI; significant  $p$ -values ( $p < 0.05$ ) are colored red.



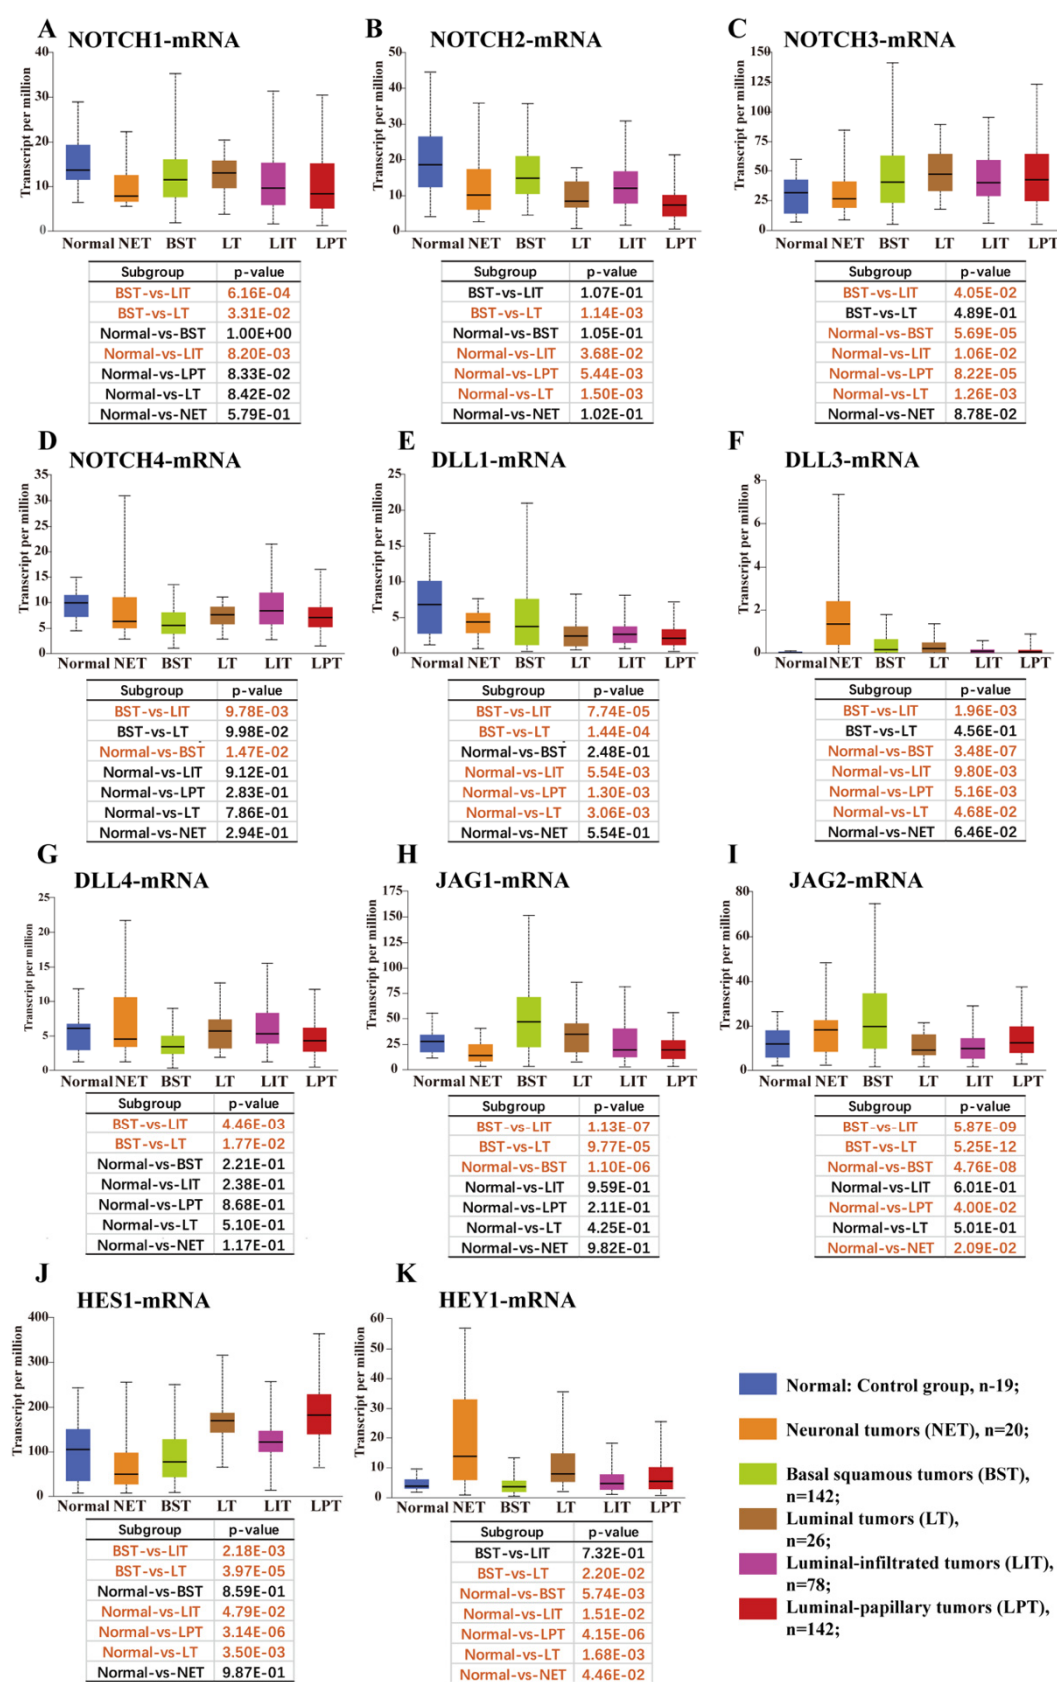

**Figure S5.** Expression of Notch-related genes in relation to molecular subtypes; box indicates 25%-75% percentile, line = median, whiskers indicate 95% CI; significant *p*-values (*p* < 0.05) are colored red.

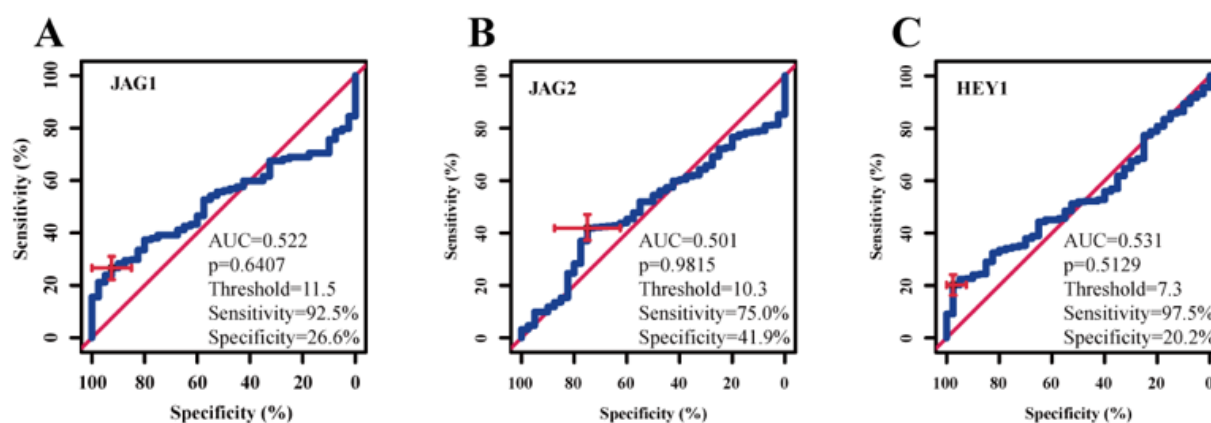

**Figure S6.** Diagnostic value of Notch pathway related genes. (A) JAG1, (B) JAG2, (C) HEY1.

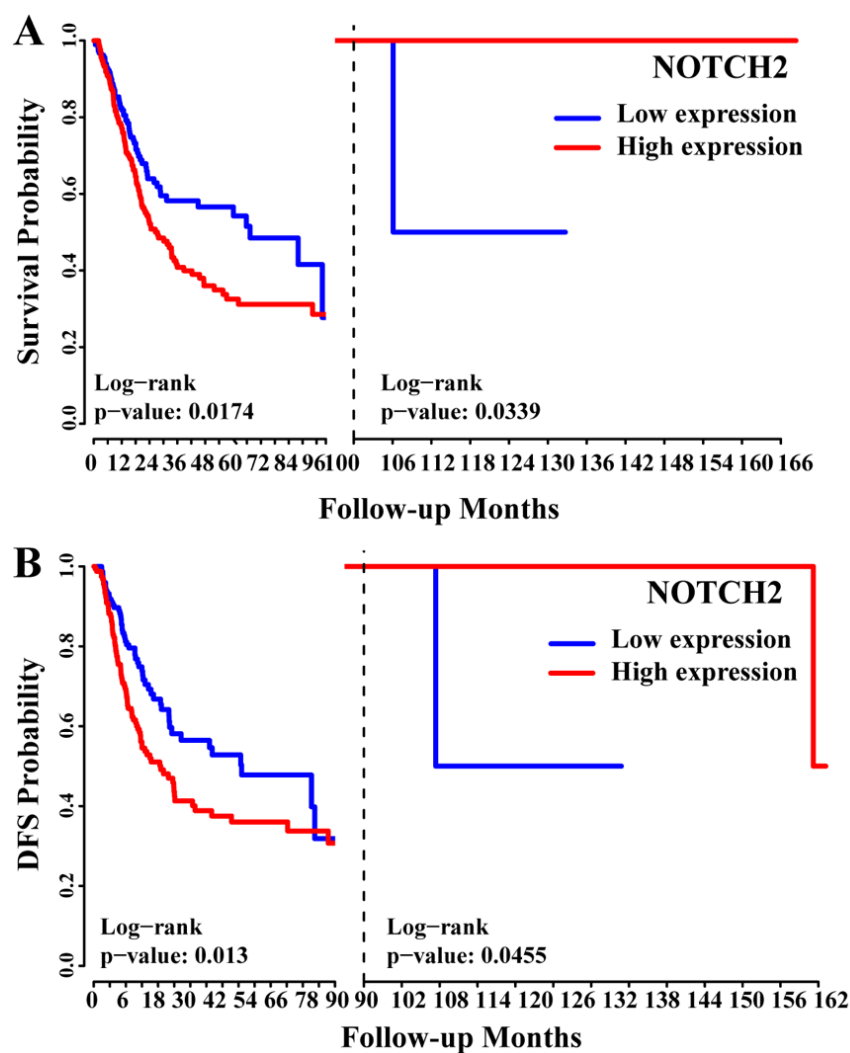

**Figure S7.** Landmark Analysis and Time Dependent Covariates of NOTCH2. Data from TCGA-BLCA,  $n = 406$ ; dead,  $n = 179$ , alive,  $n = 227$ ; Recurrence,  $n = 141$ , not recurrence,  $n = 177$ ; see Table S6 for threshold (cut-off value) used to define the high and low levels of risk; Y-axis = Overall Survival probability, X-axis = follow up in months, high expression (red line), low expression (blue line).

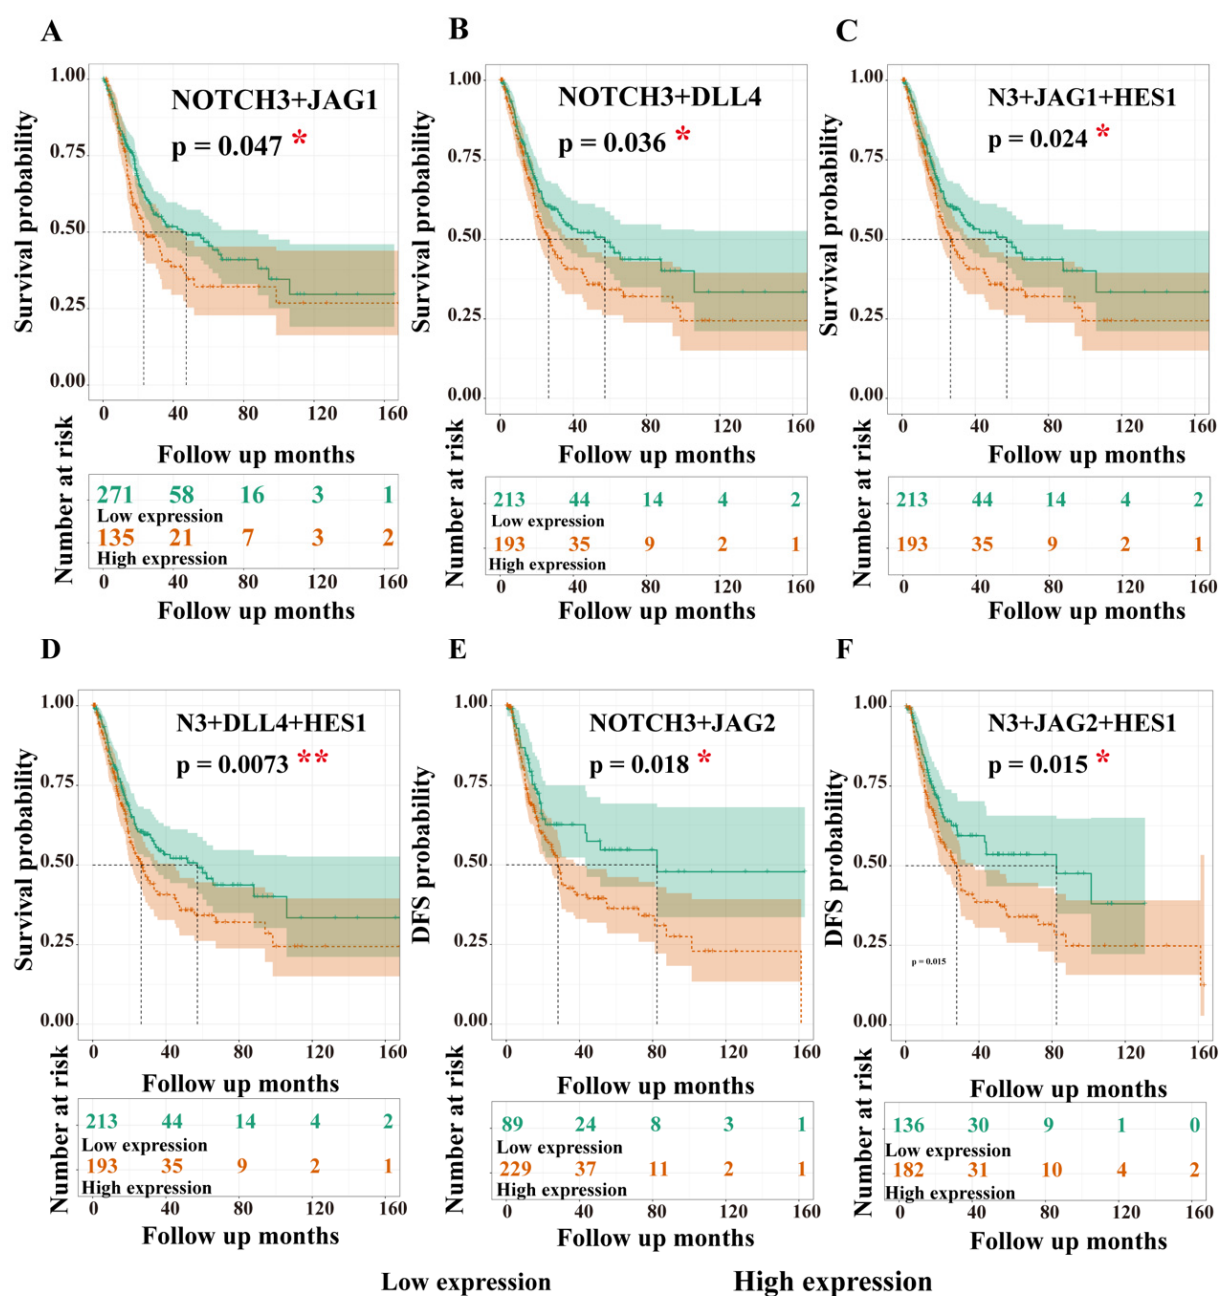

**Figure S8.** OS/DFS analyses of the combination of the target genes. data from TCGA-BLCA,  $n = 406$ ; dead,  $n = 179$ , alive,  $n = 227$ ; Recurrence,  $n = 141$ , not recurrence,  $n = 177$ ; see Table S6 for threshold (cut-off value) used to define the high and low levels of risk; Y-axis = Overall Survival probability, X-axis = follow up in months, high expression (orange line), low expression (green line); the number at risk in high- and low-expression group are listed in the tables below the survival curve; significance levels are marked as:  $*p < 0.05$ ,  $**p < 0.01$ ,  $***p < 0.001$ ,  $****p < 0.0001$ .



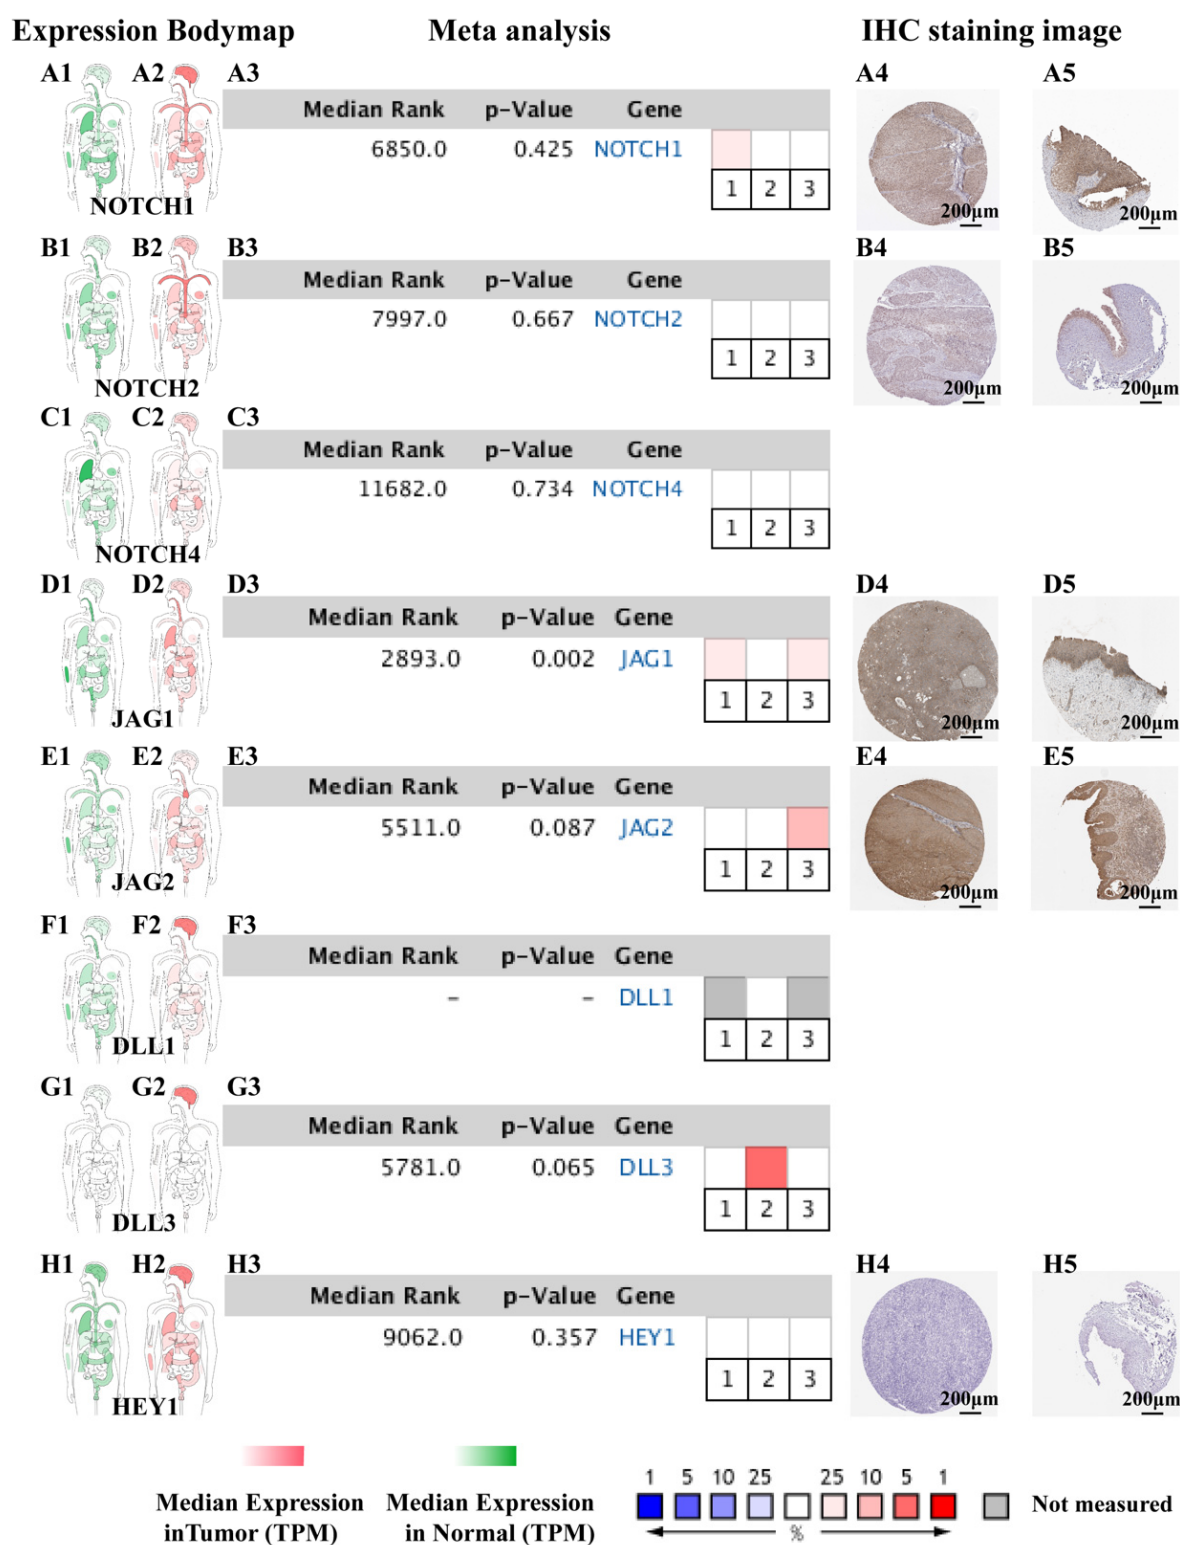

**Figure S9.** Oncomine meta-analysis of representative genes in BCa vs non-cancerous tissue, and the body maps depicting the mRNA expression levels of the target genes. (i) Oncomine meta-analysis of NOTCH1 (A), NOTCH2 (B), NOTCH4 (C), JAG1 (D), JAG2(E), DLL1 (F), DLL3 (G), and HEY1 (H) in BCa vs non-cancerous bladder tissue (<https://www.oncomine.org/>, accessed on Dec.13. 2020) [65]; heat maps of NOTCH3, DLL4 and HES1 demonstrating the gene expression in BCa samples vs. non-cancerous tissues as reported in (1) Dyrskjot et al., Cancer Res, 2004 [71], infiltrating bladder

urothelial carcinoma ( $n = 13$ ) vs. normal ( $n = 14$ ); (2) Lee et al., J Clin Oncol, 2010 [73], infiltrating bladder urothelial carcinoma ( $n = 62$ ) vs. normal ( $n = 10$ ); (3) Sanchez-Carbayo et al., J Clin Oncol, 2006 [72], infiltrating bladder urothelial carcinoma ( $n = 72$ ) vs. normal ( $n = 52$ ); right hand: median rank (median rank of the gene across each of the analyses);  $p$ -value ( $p$ -value for the median-ranked analysis); color of the boxes indicates the percentile of the z-transformed expression level of the gene in the particular study; left hand:  $p = (p$ -value reported in each of the studies); NA and the box was filled in grey mean not measured in the study. (ii) The median expression of NOTCH1 (A1, A2), NOTCH2 (B1,B2), NOTCH4 (C1,C2), JAG1 (D1,D2), JAG2(E1,E2), DLL1 (F1,F2), DLL3 (G1,G2), and HEY1 (H1,H2), in normal tissues (green) and tumours (red) in various organs; body maps constructed based on the GEPIA database (<http://gepia.cancer-pku.cn>, accessed on Nov. 12. 2020) [61], transcripts per million (TPM); (iii) IHC images credit: Human Protein Atlas (<https://www.protein-atlas.org/>, accessed on Dec.13. 2020) [65]; IHC staining of NOTCH1 (A4) NOTCH2 (B4), JAG1(D4), JAG2 (E4) in cancerous; NOTCH1 (A5), NOTCH2 (B5), JAG1 (D5), JAG2 (E5) in normal tissue(brown precipitates); HEY1 were negative both in cancer and normal.

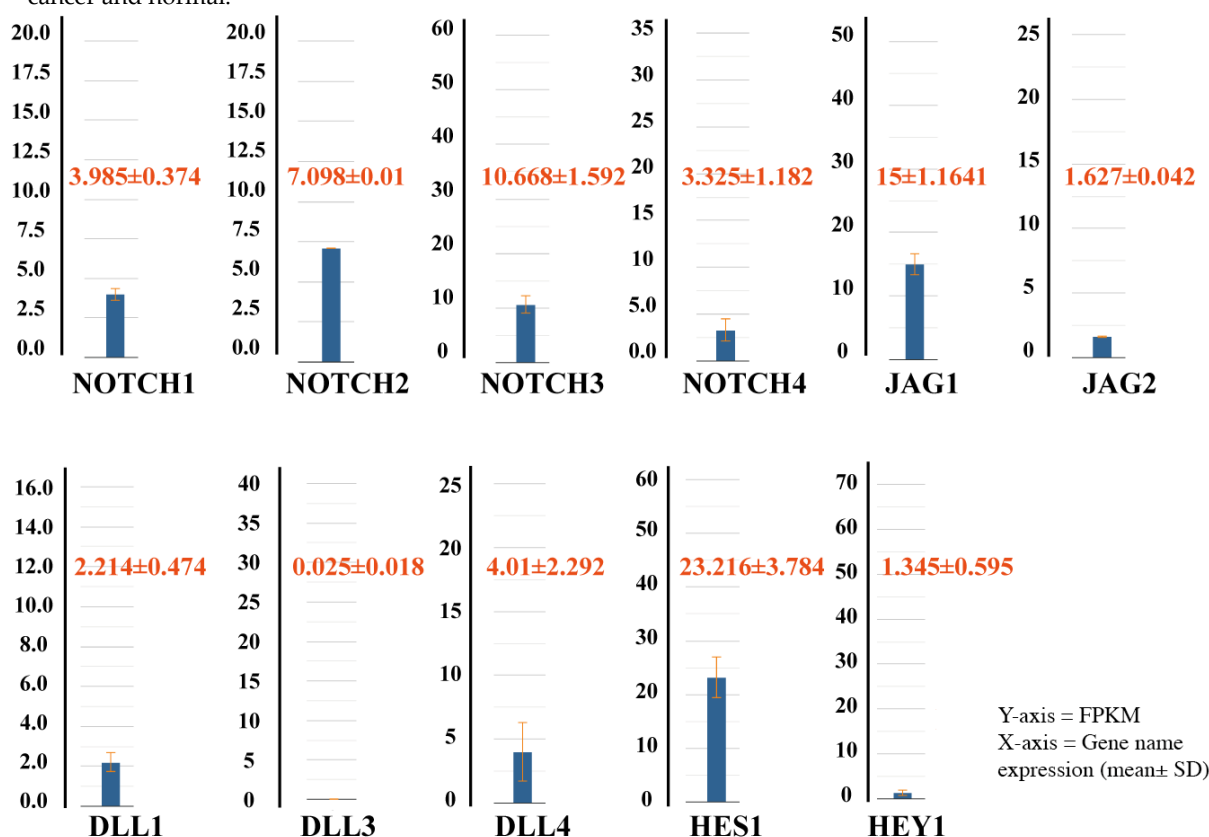

**Figure S10.** The expression level of target genes in normal bladder tissue. RNA-sequencing (RNA-seq) by the National Center for Biotechnology Information (NCBI, USA) (<https://www.ncbi.nlm.nih.gov/pmc/>, accessed on Dec.13. 2020), (BioProject: PRJEB4337,  $n = 95$ , human) (Figure S6) [81,82]. The mean  $\pm$  SD of the expression level were listed in the figures.

**Table S6.** The OS/DFS analysis of target genes and combinations in BCa.

| Name | Cut-Off/OS | p-value | Name | Cut-Off/DFS | p-value | Name             | Cut-Off/<br>Combination | p-value |
|------|------------|---------|------|-------------|---------|------------------|-------------------------|---------|
| N1   | 11.9       | 0.21    | N1   | 11.6        | 0.32    | N3+JAG1          | 23.7 (↓)/OS             | 0.047   |
| N2   | 11.8 (↑↓)  | 0.017   | N2   | 11.8 (↑↓)   | 0.013   | N3+DLL4          | 15.7 (↓)/OS             | 0.036   |
| N3   | 13.6 (↓)   | 0.0015  | N3   | 13.5 (↓)    | 0.025   | N3+JAG1+HE<br>S1 | 15.6 (↓)/OS             | 0.0024  |
| N4   | 8.5        | 0.2     | N4   | 9.5         | 0.45    | N3+DLL4+HE<br>S1 | 8.5 (↓)/OS              | 0.0073  |
| JAG1 | 14.8 (↓)   | <0.0001 | JAG1 | 14.3 (↓)    | 0.038   | N3+JAG2          | 10.4 (↓)/DFS            | 0.018   |
| JAG2 | 9.7        | 0.22    | JAG2 | 9.7 (↓)     | 0.022   | N3+JAG2+HE<br>S1 | 4.1 (↓)/DFS             | 0.015   |
| DLL1 | 10.5       | 0.15    | DLL1 | 8.3         | 0.49    |                  |                         |         |
| DLL3 | 5.2        | 0.48    | DLL3 | 3.8         | 0.3     |                  |                         |         |
| DLL4 | 9.4 (↓)    | 0.0084  | DLL4 | 8 (↑)       | 0.027   |                  |                         |         |
| HES1 | 11.6 (↑)   | 0.00094 | HES1 | 11.8 (↑)    | 0.0023  |                  |                         |         |
| HEY1 | 12 (↓)     | 0.045   | HEY1 | 11.5 (↓)    | 0.046   |                  |                         |         |

NOTCH1 (N1), NOTCH2 (N2), NOTCH3 (N3), NOTCH4 (N4); (↑) means the case with high expression was associated with prolonged OS; (↓) means case with low expression was associated with prolonged OS. (↑↓) means the risk or advantageous factor was separated into different time periods.

**Table S16.** The overall survival analysis of target genes in BCa based on HPA.

| Name   | cut-off value | p-value | Cases in high expression<br>group | Cases in low expression<br>group |
|--------|---------------|---------|-----------------------------------|----------------------------------|
| NOTCH1 | 11.7          | 0.088   | 84                                | 322                              |
| NOTCH2 | 4.46 (↑↓)     | 0.0073  | 228                               | 178                              |
| NOTCH3 | 27.73 (↓)     | 0.002   | 177                               | 229                              |
| NOTCH4 | 2.33          | 0.31    | 97                                | 309                              |
| JAG1   | 29.27 (↓)     | 0.0014  | 82                                | 324                              |
| JAG2   | 2.79          | 0.22    | 310                               | 96                               |
| DLL1   | 1.97          | 0.17    | 211                               | 195                              |
| DLL3   | 0.28          | 0.3     | 117                               | 289                              |
| DLL4   | 3.04 (↓)      | 0.0055  | 118                               | 288                              |
| HES1   | 41.65 (↑)     | 0.00002 | 298                               | 108                              |
| HEY1   | 5.37          | 0.1     | 89                                | 317                              |

“↑” means the case with high expression associate with prolong prognosis; “↓” means case with high expression associate with poor prognosis. “↑↓” means the risk or advantageous factor was separated into different period.
